# Supplementary material for: Developing a novel magnetic organic polymer for selective extraction and determination of 16 macrolides in water and honey samples
Source: Royal Society of Chemistry journal article supplement (doi:10.1039/d4ra00496e), 2024-01-01
Supplement: d4ra00496e1.pdf [file d4ra00496e1.pdf]

## Supplementary information

### Developing a novel magnetic organic polymer for selective extraction and determination of 16 macrolides in water and honey samples

Mengnan Liang,<sup>a</sup> Na Li,<sup>a</sup> Hao Zhang,<sup>a</sup> Ling Ma<sup>\*bc</sup> and Ke Wang<sup>\*abc</sup>

<sup>a</sup> College of Chemistry and Materials Science, Hebei Normal University, Shijiazhuang 050023, China

<sup>b</sup> Shijiazhuang Center for Disease Control and Prevention, Shijiazhuang 050011, China

<sup>c</sup> Shijiazhuang Technology Innovation Center for Chemical Poison Detection and Risk Early Warning, Shijiazhuang 050011, China

\* Corresponding authors at: College of Chemistry and Materials Science, Hebei Normal University, Shijiazhuang, China; Shijiazhuang Center for Disease Control and Prevention, Shijiazhuang, China; Shijiazhuang Technology Innovation Center for Chemical Poison Detection and Risk Early Warning, Shijiazhuang, China

E-mail addresses: wkecdc@163.com, mamalin001@163.com

**Fig. S1** The MRM chromatograms of 16 MALs.

**Fig. S2** The reusability of Fe<sub>3</sub>O<sub>4</sub>@SiO<sub>2</sub>@Tb-PDAN.

**Fig. S3** Comparison of extraction efficiency among Fe<sub>3</sub>O<sub>4</sub>@SiO<sub>2</sub> and Fe<sub>3</sub>O<sub>4</sub>@SiO<sub>2</sub>@Tb-PDAN.

**Table S1** The standard information of 16 MALs.

**Table S2** Mass spectrometry conditions of 16 MALs.

**Table S3** Matrix effects of 16 MALs.

**Table S4** Analytical performance of the proposed method for analysis of MALs.

**Table S5** Adsorption rate of loading of Tb-PDAN in different concentration to Fe<sub>3</sub>O<sub>4</sub>@SiO<sub>2</sub>.

**Table S6** Adsorption of different types of analytes with Fe<sub>3</sub>O<sub>4</sub>@SiO<sub>2</sub>@Tb-PDAN.

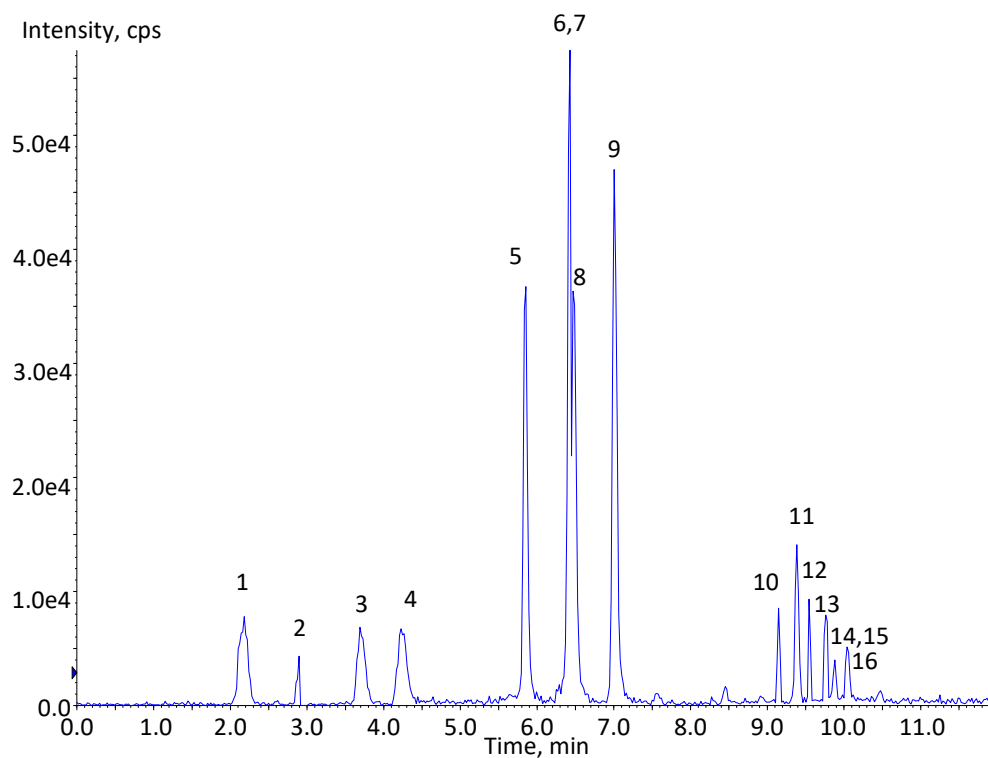

**Fig. S1** The MRM chromatograms of 16 MALs ( $0.2 \mu\text{g}\cdot\text{L}^{-1}$ ). 1. Clindamycin, 2. Tilmicosin, 3. Oleandomycin, 4. Erythromycin, 5. Anhydroerythromycin A, 6. Clarithromycin 7. Roxithromycin, 8. Erythromycin A enol ether, 9. Oleandomycin triacetate, 10. Eprinomectin, 11. Avermectin, 12. Dolamectin, 13. Ememectin, 14. Serramectin, 15. Ivermectin 16. Moximycin

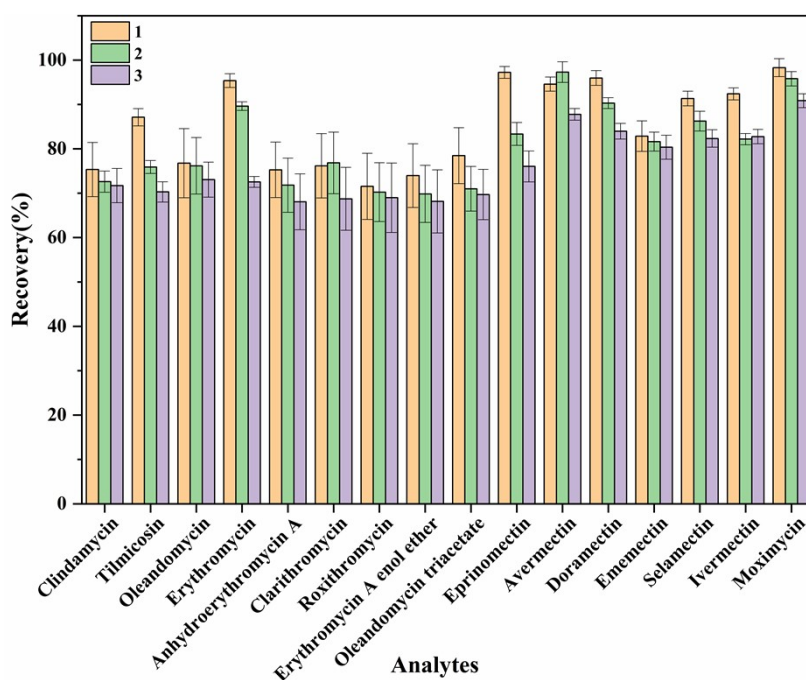

**Fig. S2** The reusability of  $\text{Fe}_3\text{O}_4@\text{SiO}_2@\text{Tb-PDAN}$ .

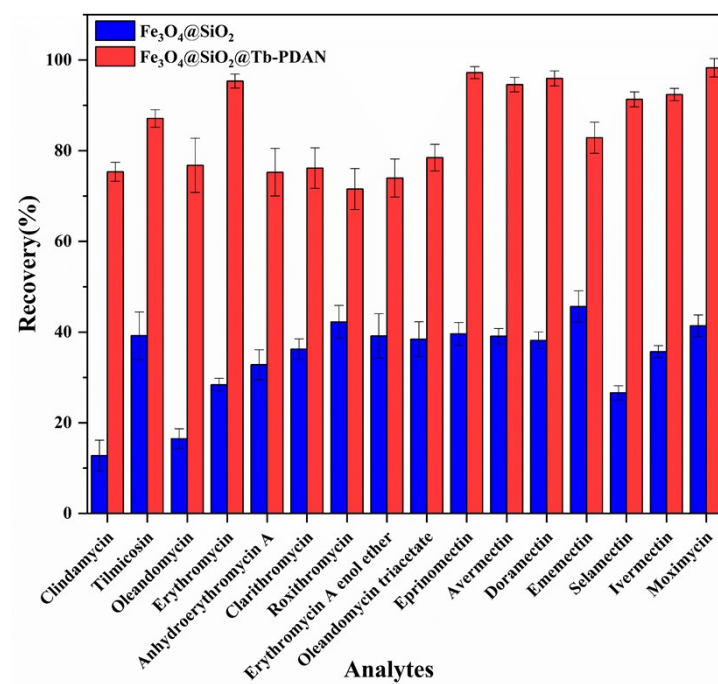

Fig. S3 Comparison of extraction efficiency among  $\text{Fe}_3\text{O}_4@\text{SiO}_2$  and  $\text{Fe}_3\text{O}_4@\text{SiO}_2@\text{Tb-PDAN}$ .

**Table S1** The standard information of 16 MALs

| Analytes                  | CAS         | Molecular formula                                                             | Purity (%) |
|---------------------------|-------------|-------------------------------------------------------------------------------|------------|
| Clindamycin               | 18323-44-9  | C <sub>18</sub> H <sub>33</sub> ClN <sub>2</sub> O <sub>5</sub> S             | 94.1       |
| Tilmicosin                | 108050-54-0 | C <sub>46</sub> H <sub>80</sub> N <sub>2</sub> O <sub>13</sub>                | 80.7       |
| Oleandomycin              | 3922-90-5   | C <sub>35</sub> H <sub>61</sub> NO <sub>12</sub>                              | 95.0       |
| Erythromycin              | 114-07-8    | C <sub>37</sub> H <sub>67</sub> NO <sub>13</sub>                              | 95.0       |
| Anhydroerythromycin A     | 23893-13-2  | C <sub>37</sub> H <sub>65</sub> NO <sub>12</sub>                              | 97.0       |
| Clarithromycin            | 81103-11-9  | C <sub>38</sub> H <sub>69</sub> NO <sub>13</sub>                              | 98.9       |
| Roxithromycin             | 80214-83-1  | C <sub>41</sub> H <sub>76</sub> NO <sub>15</sub>                              | 96.2       |
| Erythromycin A enol ether | 33396-29-1  | C <sub>37</sub> H <sub>65</sub> NO <sub>15</sub>                              | 96.0       |
| Oleandomycin triacetate   | 2751-09-9   | C <sub>41</sub> H <sub>67</sub> NO <sub>15</sub>                              | 97.0       |
| Eprinomectin              | 123997-26-2 | C <sub>50</sub> H <sub>75</sub> Cl <sub>2</sub> N <sub>2</sub> O <sub>5</sub> | 99.5       |
| Avermectin                | 71751-41-2  | C <sub>49</sub> H <sub>74</sub> O <sub>14</sub>                               | 98.0       |
| Doramectin                | 117704-25-3 | C <sub>50</sub> H <sub>74</sub> O <sub>14</sub>                               | 96.0       |
| Ememectin                 | 119791-41-2 | C <sub>49</sub> H <sub>77</sub> NO <sub>13</sub>                              | 98.3       |
| Selamectin                | 220119-17-5 | C <sub>43</sub> H <sub>63</sub> NO <sub>11</sub>                              | 96.5       |
| Ivermectin                | 70288-86-7  | C <sub>48</sub> H <sub>74</sub> O <sub>14</sub>                               | 98.5       |
| Moximycin                 | 113507-06-5 | C <sub>37</sub> H <sub>53</sub> NO <sub>8</sub>                               | 96.0       |

**Table S2** Mass spectrometry conditions of 16 MALs

| Analytes                  | RT <sup>a</sup> (min) | Precursor ion(m/z) | Ion mode                               | DP <sup>b</sup> (V) | Product ion(m/z) | CE <sup>c</sup> (eV) |
|---------------------------|-----------------------|--------------------|----------------------------------------|---------------------|------------------|----------------------|
| Clindamycin               | 2.20                  | 425.3              | [M+H] <sup>+</sup>                     | 95.9/137.6          | 126.2*/277.3     | 34.2/26.9            |
| Tilmicosin                | 2.83                  | 869.6              | [M+H] <sup>+</sup>                     | 70.9/67.4           | 696.5*/174.0     | 59.7/58.3            |
| Oleandomycin              | 3.77                  | 688.4              | [M+H] <sup>+</sup>                     | 102.8/106.9         | 544.5*/158.2     | 23.0/34.9            |
| Erythromycin              | 4.33                  | 734.5              | [M+H] <sup>+</sup>                     | 11.1/10.5           | 158.2*/576.6     | 38.1/27.6            |
| Anhydroerythromycin A     | 5.93                  | 716.5              | [M+H] <sup>+</sup>                     | 88.1/107.0          | 558.4*/158.3     | 22.5/38.1            |
| Clarithromycin            | 6.47                  | 748.5              | [M+H] <sup>+</sup>                     | 104.0/116.1         | 158.1*/590.4     | 35.7/27.1            |
| Roxithromycin             | 6.47                  | 837.6              | [M+H] <sup>+</sup>                     | 109.3/119.1         | 679.5*/158.2     | 30.2/40.2            |
| Erythromycin A enol ether | 6.54                  | 716.5              | [M+H] <sup>+</sup>                     | 101.7/106.0         | 558.4*/158.2     | 24.3/38.1            |
| Oleandomycin triacetate   | 7.13                  | 772.4              | [M-COCH <sub>3</sub> +2H] <sup>+</sup> | 124.2/127.3         | 158.2*/586.4     | 30.7/27.0            |
| Eprinomectin              | 9.13                  | 914.5              | [M+H] <sup>+</sup>                     | 200.2/164.1         | 186.0*/330.2     | 23.2/20.6            |
| Avermectin                | 9.38                  | 890.5              | [M+NH <sub>4</sub> ] <sup>+</sup>      | 84.0/99.9           | 305.1*/567.3     | 34.5/19.3            |
| Doramectin                | 9.55                  | 916.5              | [M+NH <sub>4</sub> ] <sup>+</sup>      | 80.7/95.1           | 331.3*/593.3     | 34.3/19.4            |
| Ememectin                 | 9.79                  | 886.4              | [M+H] <sup>+</sup>                     | 65.9/65.9           | 158.2*/126.1     | 42.1/40.1            |
| Selamectin                | 9.85                  | 770.5              | [M+H] <sup>+</sup>                     | 14.1/14.0           | 608.5*/626.0     | 28.1/24.1            |
| Ivermectin                | 9.87                  | 892.7              | [M+NH <sub>4</sub> ] <sup>+</sup>      | 97.2/101.0          | 569.5*/307.0     | 20.1/30.8            |
| Moximycin                 | 10.02                 | 640.3              | [M+H] <sup>+</sup>                     | 30.9/66.1           | 528.4*/498.0     | 12.6/18.8            |

\* Quantitative ion; <sup>a</sup> Retention time; <sup>b</sup> Declustering potential; <sup>c</sup> Collision energy

**Table S3** Matrix effects of 16 MALs

| Analytes                  | Matrix effect(%) |              |
|---------------------------|------------------|--------------|
|                           | Water Sample     | Honey Sample |
| Clindamycin               | 101.93           | 109.21       |
| Tilmicosin                | 107.13           | 80.02        |
| Oleandomycin              | 94.75            | 105.18       |
| Erythromycin              | 110.51           | 106.18       |
| Anhydroerythromycin A     | 91.81            | 100.06       |
| Clarithromycin            | 100.14           | 113.56       |
| Roxithromycin             | 99.97            | 118.03       |
| Erythromycin A enol ether | 99.89            | 102.26       |
| Oleandomycin triacetate   | 109.26           | 90.83        |
| Eprinomectin              | 85.90            | 93.81        |
| Avermectin                | 116.41           | 118.93       |
| Doramectin                | 106.75           | 89.68        |
| Ememectin                 | 94.62            | 96.06        |
| Selamectin                | 117.58           | 91.41        |
| Ivermectin                | 113.61           | 119.71       |
| Moximycin                 | 113.67           | 118.96       |

**Table S4** Analytical performance of the proposed method for analysis of MALs

| Analytes                  | Linear Range ( $\mu\text{g}\cdot\text{L}^{-1}$ ) | Linearity equation   | r      | Water sample                             |                                          | Honey sample                              |                                           |
|---------------------------|--------------------------------------------------|----------------------|--------|------------------------------------------|------------------------------------------|-------------------------------------------|-------------------------------------------|
|                           |                                                  |                      |        | LODs ( $\mu\text{g}\cdot\text{L}^{-1}$ ) | LOQs ( $\mu\text{g}\cdot\text{L}^{-1}$ ) | LODs ( $\mu\text{g}\cdot\text{kg}^{-1}$ ) | LOQs ( $\mu\text{g}\cdot\text{kg}^{-1}$ ) |
| Clindamycin               | 0.1-200                                          | Y=190061.0X+30610.4  | 0.9999 | 0.011                                    | 0.037                                    | 0.367                                     | 1.222                                     |
| Tilmicosin                | 0.1-200                                          | Y=4185.8X+74.3       | 0.9992 | 0.001                                    | 0.003                                    | 0.001                                     | 0.003                                     |
| Oleandomycin              | 0.1-200                                          | Y=118229.0X+29043.2  | 0.9996 | 0.002                                    | 0.007                                    | 0.003                                     | 0.009                                     |
| Erythromycin              | 0.1-200                                          | Y=144979.0X+29470.2  | 0.9998 | 0.011                                    | 0.037                                    | 0.006                                     | 0.021                                     |
| Anhydroerythromycin A     | 0.1-200                                          | Y=232197.0X+103703.0 | 0.9996 | 0.001                                    | 0.003                                    | 0.017                                     | 0.056                                     |
| Clarithromycin            | 0.1-200                                          | Y=256965.0X+370068.0 | 0.9997 | 0.003                                    | 0.009                                    | 0.004                                     | 0.014                                     |
| Roxithromycin             | 0.1-200                                          | Y=244337.0X+317678.0 | 0.9993 | 0.002                                    | 0.005                                    | 0.011                                     | 0.037                                     |
| Erythromycin A enol ether | 0.1-200                                          | Y=152140.0X+140922.0 | 0.9991 | 0.001                                    | 0.002                                    | 0.008                                     | 0.028                                     |
| Oleandomycin triacetate   | 0.1-200                                          | Y=470647.0X+623192.0 | 0.9997 | 0.001                                    | 0.004                                    | 0.007                                     | 0.023                                     |
| Eprinomectin              | 0.1-200                                          | Y=885.9X+2302.8      | 0.9992 | 0.005                                    | 0.017                                    | 0.002                                     | 0.006                                     |
| Avermectin                | 0.1-200                                          | Y=8479.8X+3263.5     | 0.9999 | 0.008                                    | 0.028                                    | 0.007                                     | 0.025                                     |
| Doramectin                | 0.1-200                                          | Y=4869.1X+463.6      | 0.9991 | 0.012                                    | 0.038                                    | 0.001                                     | 0.003                                     |
| Ememectin                 | 0.1-200                                          | Y=101868.0X+110624   | 0.9997 | 0.001                                    | 0.005                                    | 0.002                                     | 0.007                                     |
| Selamectin                | 0.1-200                                          | Y=19167.3X+1716.1    | 0.9999 | 0.008                                    | 0.025                                    | 0.006                                     | 0.020                                     |
| Ivermectin                | 0.1-200                                          | Y=7459.3X+5422.1     | 0.9994 | 0.008                                    | 0.026                                    | 0.013                                     | 0.043                                     |
| Moximycin                 | 0.1-200                                          | Y=62952.8X+65484.1   | 0.9993 | 0.001                                    | 0.002                                    | 0.004                                     | 0.014                                     |

**Table S5** Adsorption rate of loading of Tb-PDAN in different concentration to Fe<sub>3</sub>O<sub>4</sub>@SiO<sub>2</sub>

| Analytes                  | Adsorption rate (%) |                     |                   |
|---------------------------|---------------------|---------------------|-------------------|
|                           | Low <sup>a</sup>    | Medium <sup>b</sup> | High <sup>c</sup> |
| Clindamycin               | 26.73               | 71.74               | 74.29             |
| Tilmicosin                | 54.20               | 87.28               | 84.57             |
| Oleandomycin              | 38.48               | 78.81               | 75.81             |
| Erythromycin              | 50.39               | 95.49               | 94.14             |
| Anhydroerythromycin A     | 48.60               | 72.03               | 71.34             |
| Clarithromycin            | 55.23               | 74.69               | 70.89             |
| Roxithromycin             | 61.25               | 71.86               | 72.35             |
| Erythromycin A enol ether | 58.65               | 73.98               | 70.82             |
| Oleandomycin triacetate   | 62.48               | 78.19               | 79.94             |
| Eprinomectin              | 56.16               | 94.90               | 96.32             |
| Avermectin                | 58.09               | 95.96               | 94.33             |
| Doramectin                | 57.16               | 93.90               | 92.10             |
| Ememectin                 | 54.66               | 81.14               | 80.14             |
| Selamectin                | 38.53               | 90.95               | 92.38             |
| Ivermectin                | 59.68               | 95.24               | 92.95             |
| Moximycin                 | 58.40               | 96.10               | 95.18             |

<sup>a</sup> Tb (26.0 mg), PDAN (37.5 mg), Fe<sub>3</sub>O<sub>4</sub>@SiO<sub>2</sub> (100 mg); <sup>b</sup> Tb (51.9 mg), PDAN (75.0 mg), Fe<sub>3</sub>O<sub>4</sub>@SiO<sub>2</sub> (100 mg); <sup>c</sup> Tb (103.8 mg), PDAN (150.0 mg), Fe<sub>3</sub>O<sub>4</sub>@SiO<sub>2</sub> (100 mg)

**Table S6** Adsorption of different types of analytes with Fe<sub>3</sub>O<sub>4</sub>@SiO<sub>2</sub>@Tb-PDAN

| Analytes                  | Log K <sub>ow</sub> <sup>a</sup> | Recovery (%) |
|---------------------------|----------------------------------|--------------|
| MALs                      |                                  |              |
| Clindamycin               | 1.83                             | 75.33        |
| Tilmicosin                | 4.95                             | 87.11        |
| Oleandomycin              | 1.23                             | 76.76        |
| Erythromycin              | 2.83                             | 95.37        |
| Anhydroerythromycin A     | 3.93                             | 75.27        |
| Clarithromycin            | 3.16                             | 76.17        |
| Roxithromycin             | 3.73                             | 71.54        |
| Erythromycin A enol ether | 3.81                             | 73.96        |
| Oleandomycin triacetate   | 3.36                             | 78.46        |

---

|              |               |      |       |
|--------------|---------------|------|-------|
|              | Eprinomectin  | 6.22 | 97.23 |
|              | Avermectin    | 6.51 | 94.58 |
|              | Doramectin    | 7.16 | 95.96 |
|              | Ememectin     | 6.84 | 82.86 |
|              | Selamectin    | 6.61 | 91.33 |
|              | Ivermectin    | 6.83 | 92.38 |
|              | Moximycin     | 8.43 | 98.29 |
| QNs          | Ofloxacin     | 0.84 | 27.86 |
|              | Tosufloxacin  | 1.22 | 31.23 |
| $\beta$ -LAs | Ticarcillin   | 0.69 | 2.51  |
|              | Amoxicillin   | 0.61 | 3.16  |
|              | Ceftizoxime   | 0.59 | 5.26  |
| SAs          | Sulfathiazole | 0.05 | 0.84  |
|              | Sulfapyridine | 0.03 | 1.49  |
|              | Sulfacetamide | 0.07 | 0.71  |

---

<sup>a</sup> LogK<sub>ow</sub>: octanol/water partition coefficient.
